# Supplementary material for: Spatial snapshots of amyloid precursor protein intramembrane processing via early endosome proteomics
Source: PubMed Central journal article supplement (PMC9573879; doi:10.1038/s41467-022-33881-x), 2022-10-16
Supplement: 41467_2022_33881_MOESM1_ESM.pdf [file 41467_2022_33881_MOESM1_ESM.pdf]

# SUPPLEMENTAL INFORMATION

## Spatial Snapshots of Amyloid Precursor Protein Intramembrane Processing via Early Endosome Proteomics

Hankum Park<sup>1,2,^</sup>, Frances V. Hundley<sup>1,2\*</sup>, Qing Yu<sup>1\*</sup>, Katherine A. Overmyer<sup>3,4</sup>, Dain R. Brademan<sup>3,4</sup>, Lia Serrano<sup>3</sup>, Joao A. Paulo<sup>1</sup>, Julia C. Paoli<sup>1,2</sup>, Sharan Swarup<sup>1,2,#</sup>, Joshua J. Coon<sup>3,4,5</sup>, Steven P. Gygi<sup>1</sup>, and J. Wade Harper<sup>1,2</sup>

<sup>1</sup>Department of Cell Biology, Harvard Medical School, Boston, MA 02115, USA

<sup>2</sup>Aligning Science Across Parkinson's (ASAP) Collaborative Research Network, Chevy Chase, MD 20815, USA

<sup>3</sup>Department of Biomolecular Chemistry, University of Wisconsin–Madison, Madison, WI 53706, USA

<sup>4</sup>Morgridge Institute for Research, Madison, WI 53715, USA

<sup>5</sup>Department of Chemistry, University of Wisconsin–Madison, Madison, WI 53706, USA

<sup>^</sup>Current address: Department of Dental Science, School of Dentistry and Dental Research Institute, Seoul National University, Seoul 03080, Republic of Korea

<sup>#</sup>Current Address: Casma Therapeutics, Cambridge MA 02139

<sup>\*</sup>, equal contribution

Corresponding author: [wade\\_harper@hms.harvard.edu](mailto:wade_harper@hms.harvard.edu)

### Table of Contents

|                          |         |
|--------------------------|---------|
| Supplementary Fig 1..... | page 2  |
| Supplementary Fig 2..... | page 4  |
| Supplementary Fig 3..... | page 6  |
| Supplementary Fig 4..... | page 8  |
| Supplementary Fig 5..... | page 9  |
| Supplementary Fig 6..... | page 11 |
| Supplementary Fig 7..... | page 13 |
| Supplementary Fig 8..... | page 14 |

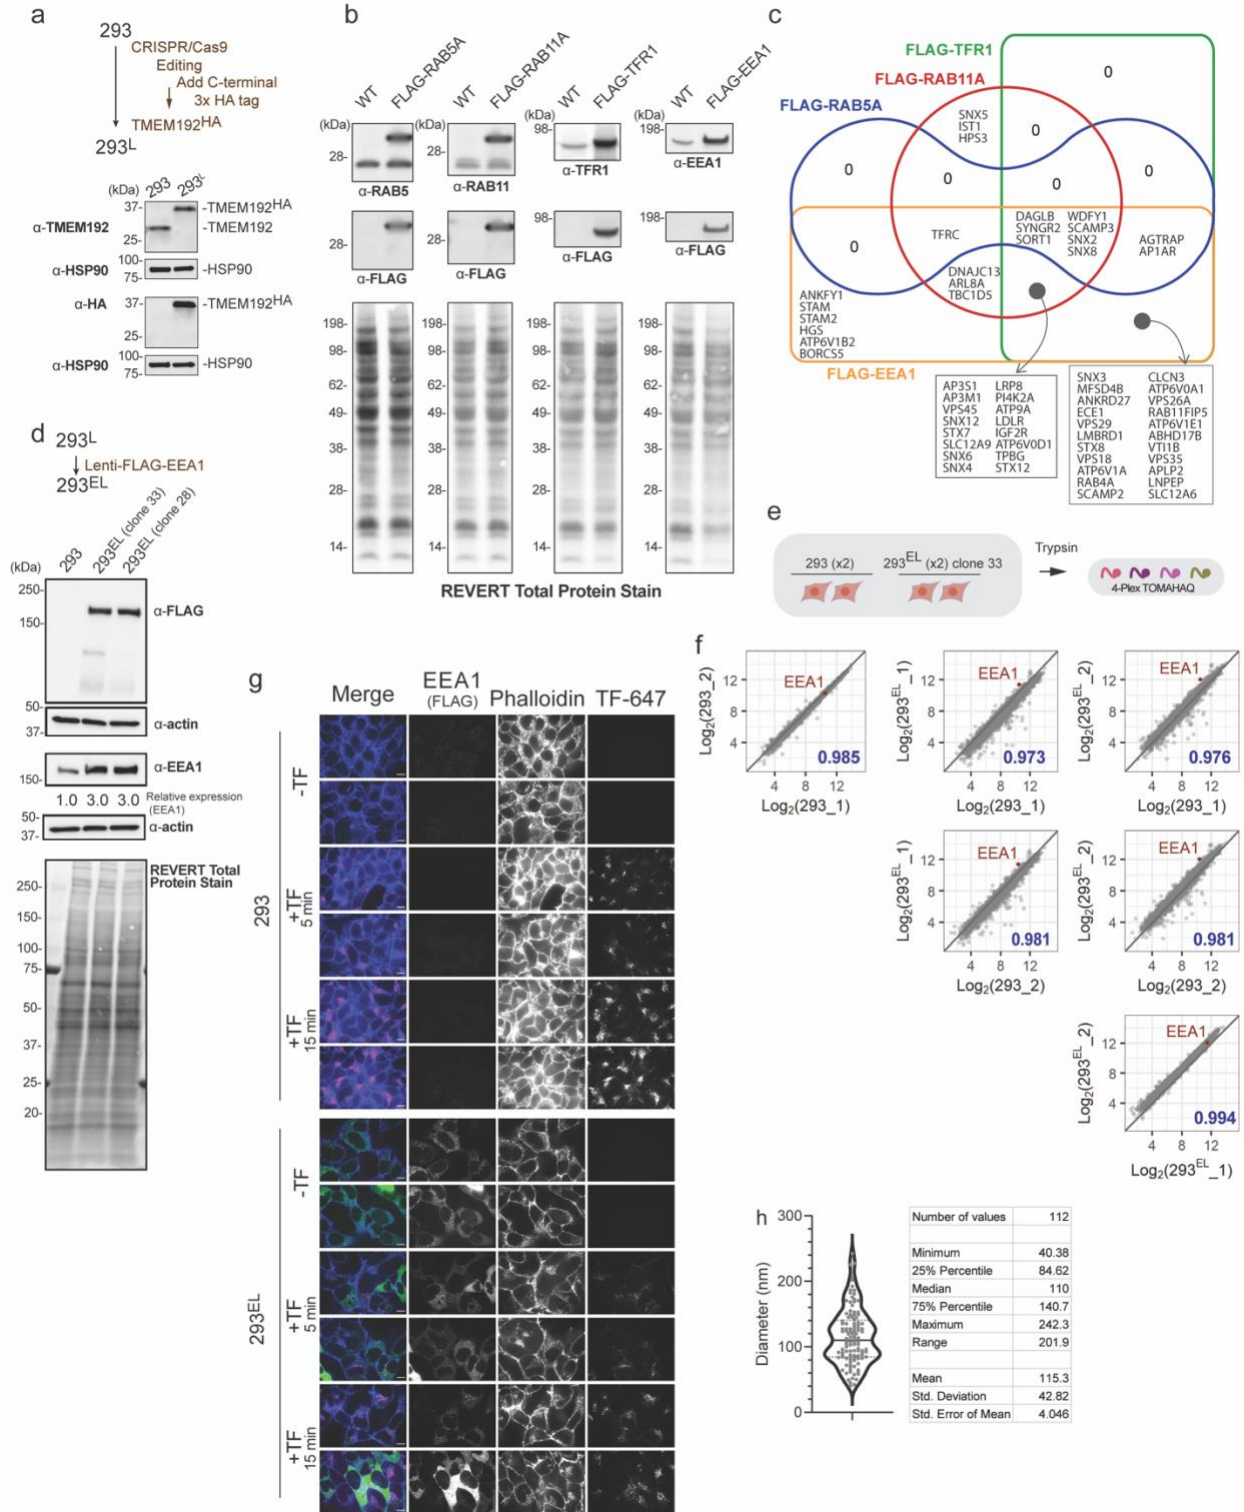

**Supplementary Fig. 1. Identification of EEA1 as a candidate affinity reagent for early endosome purification.**

a, Scheme summarizing how 293 cells were gene edited to place a C-terminal 3xHA tag on the endogenous TMEM192 gene as described<sup>31</sup> to create 293<sup>L</sup> cells. Cell extracts from 293 or 293<sup>L</sup> cells were subjected to immunoblotting with  $\alpha$ -TMEM192 and  $\alpha$ -HA to demonstrate homozygous targeting of the TMEM192 gene to

introduce the 3xHA tag, with  $\alpha$ -HSP90 used as a loading control.  $\alpha$ -TMEM192 and  $\alpha$ -HA blots were on separate gels with separate  $\alpha$ -HSP90 loading control blots.

b, The indicated FLAG-tagged proteins were stably expressed in 293<sup>L</sup> cells using a lentiviral construct. Cell extracts were subjected to immunoblotting with the indicated antibodies. Total proteins were stained with REVERT.

c, Overlap in endosomal proteins found in FLAG-EEA1, FLAG-TFR1, FLAG-RAB11, and FLAG-RAB5A immune complexes from non-detergent extracts.

d, 293<sup>L</sup> cells were transduced with a lentivirus expressing FLAG-EEA1 to create 293<sup>EL</sup> cells. Extracts from parental 293 or 293<sup>EL</sup> cells were subjected to immunoblotting with  $\alpha$ -EEA1 or  $\alpha$ -FLAG antibodies. Quantification of blots revealed ~3-fold higher levels of FLAG-EEA1 than the endogenous protein. Total proteins were stained with REVERT.

e,f, Total proteome analysis of duplicate cultures of 293 and 293<sup>EL</sup> cells. The relative abundance of individual proteins based on TMT reporter ion intensities are shown for all pair-wise combinations of biological duplicate cells (n=2) employed in the 8-plex TMT experiment. Pearson's coefficients (*R*) for pairwise comparisons are shown. The position of EEA1 is indicated by the red circle.

g, 293 or 293<sup>EL</sup> cells (clone 28) were serum starved for 1h prior to addition of serum-free media with or without Alexa-647-labeled TF (25  $\mu$ g/mL). Cells were fixed at the indicated times and subjected to imaging to visualize Alexa-647-labeled TF, immunofluorescence of FLAG-EEA1, and phalloidin. Images are representative of 5 fields from two replicate experiments. Scale bar, 10  $\mu$ m.

h, Size distribution of vesicles identified in FLAG-EEA1 immune complexes by transmission electron microscopy. The diameter for a total of 112 vesicles was measured.

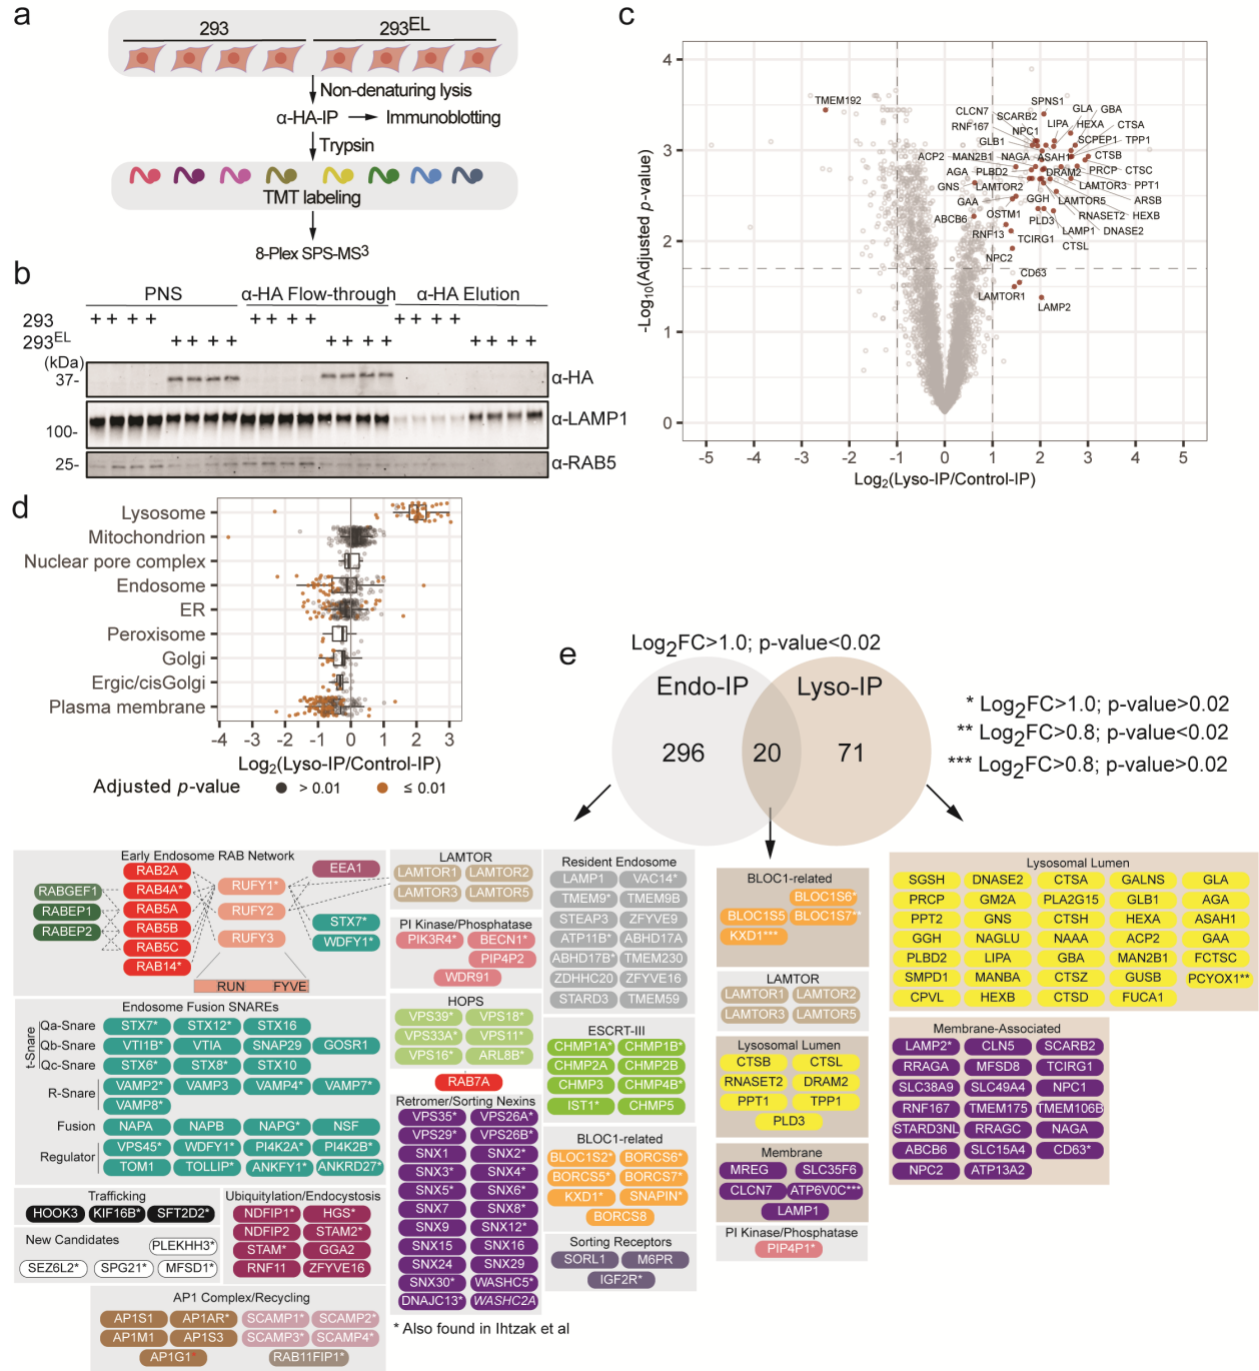

**Supplementary Fig. 2. Landscape of the lysosomal proteome and endosomal lipidome.**

a, Scheme depicting quantitative proteomics of the Lyso-IP proteome. 293 control cells or 293<sup>EL</sup> cells (clone 33) in biological quadruplicate (n=4) were subjected to the Lyso-IP protocol ( $\alpha$ -HA IP) and either subjected to immunoblotting or trypsinized prior to labeling with TMT and analysis by mass spectrometry.

b, Immunoblot of proteins from the experiment outlined in panel a. Note, TMEM192<sup>HA</sup> is not released from the  $\alpha$ -HA antibody magnetic beads under the elution conditions employed. For input and flow through, 0.05% of total was subjected to immunoblotting, whereas 6% of the elution was analyzed.

c, Proteomic analysis of lysosomes purified by Lyso-IP. Volcano plot for quadruple Lyso-IP associated proteins relative to control cells lacking TMEM192<sup>HA</sup> is shown. Selected proteins linked with lysosomes are

shown in red. Two-sided Student's t-test was performed and adjusted for multiple comparisons by two-stage Benjamini & Hochberg step-up procedure.

d, Box plots depicting the enrichment of various classes of proteins based on the annotation of Itzhak et al,<sup>32</sup> demonstrating that proteins assigned to lysosomes are the most highly enriched, while endosomal, ER, mitochondrial, and PM proteins are depleted. Orange dots correspond to proteins with an adjusted  $p$ -value < 0.01. Left border, interior line, and right border in the box plot represent the 1<sup>st</sup> quartile, median, and 3<sup>rd</sup> quartile, respectively.

e, Comparison of proteins associated with Endo- and Lyso-IPs. Proteins with  $\text{Log}_2\text{FC} > 1.0$  ( $p$ -value < 0.02) present in either Endo- or Lyso-IPs were compared in a Venn diagram. Two-sided Student's t-test was performed and adjusted for multiple comparisons by two-stage Benjamini & Hochberg step-up procedure. Proteins that are shared or exclusive to each organelle enrichment method are shown.

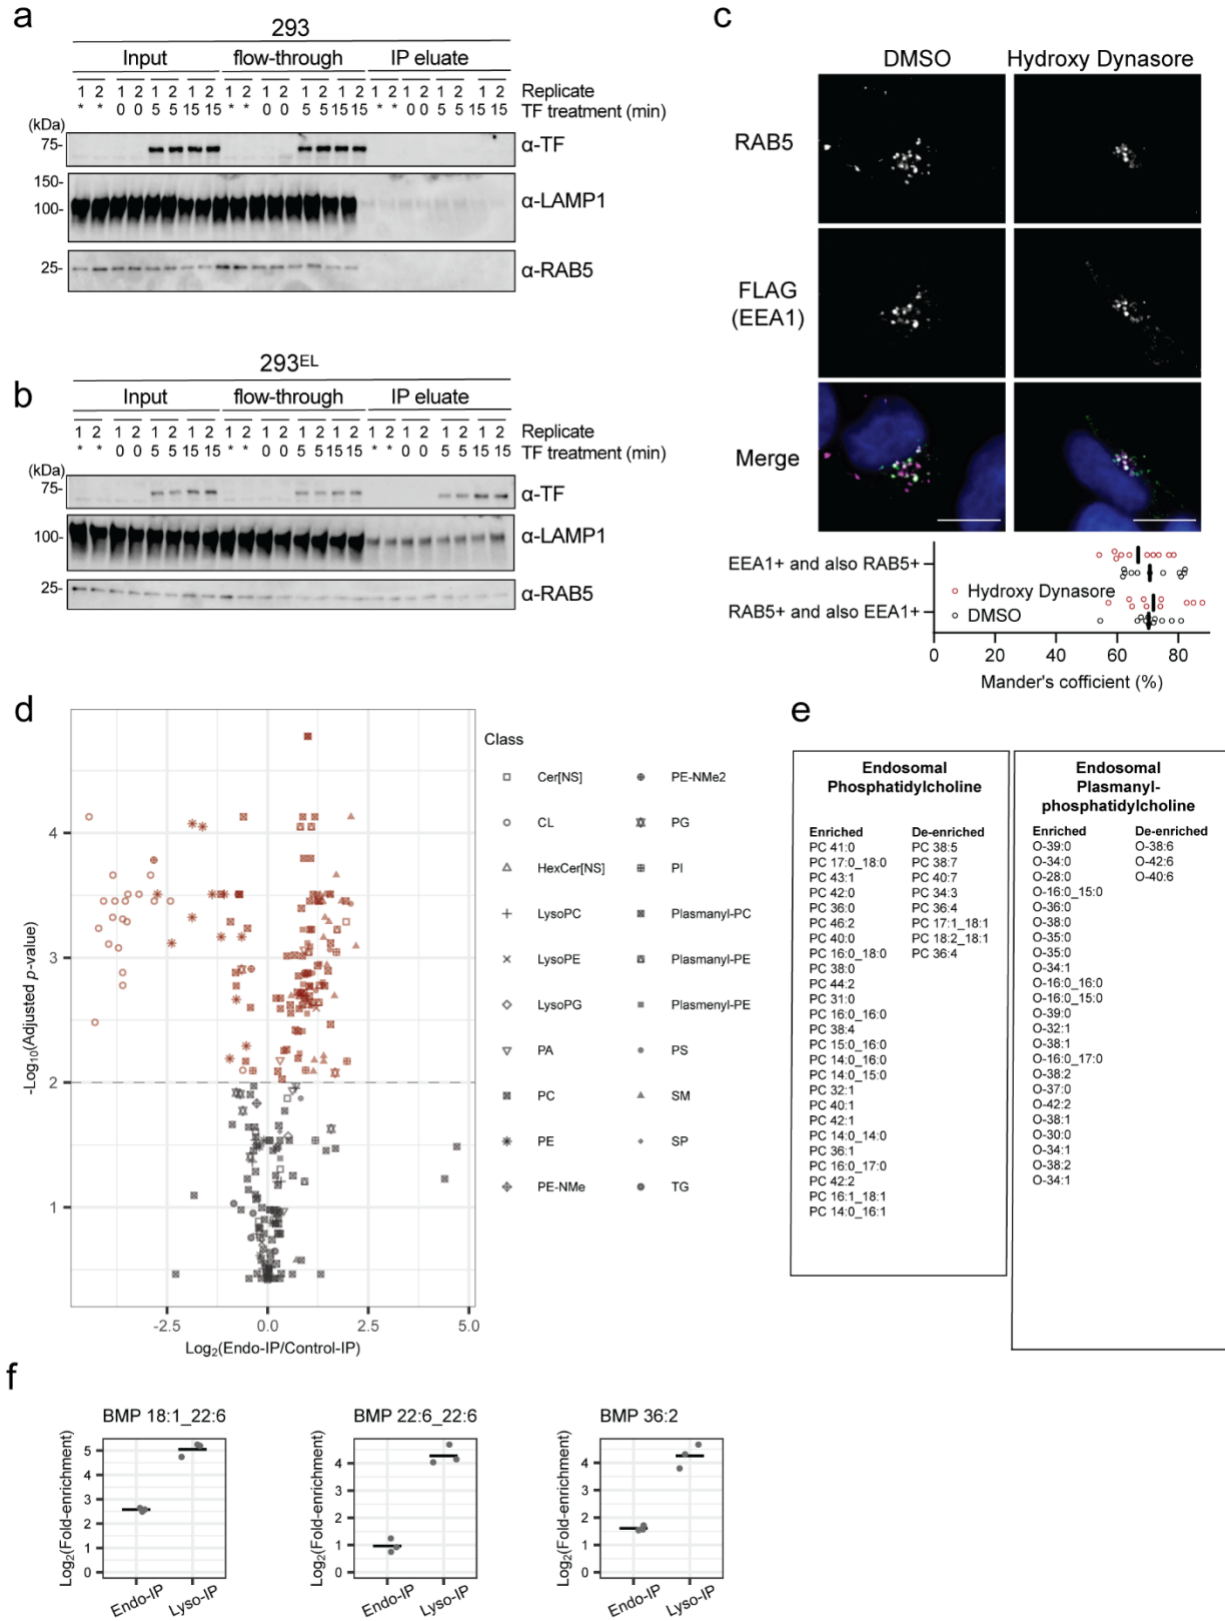

Supplementary Fig. 3. Analysis of Endo-IP for capture of dynamic cargo and lipidome analysis.

a-b, Immunoblots of Endo-IPs from the experiment outlined in Fig. 3a. 293 or 293<sup>EL</sup> cells (clone 33) were serum starved for 1h prior to addition of serum-free media supplemented with 25 µg/ml holo-transferrin (TF) in duplicate (n=2). At the indicated times, cells were harvested and extracts subjected to Endo-IP followed by immunoblotting with the indicated antibodies. Control cells not serum starved (\*). The input and flow-through after the α-FLAG IP are also shown. For input and flow through, 0.5% of total was subjected to immunoblotting, whereas 6% of the elution was analyzed. Proteomic analysis of these samples is shown in **Fig. 3c,d**.

c, 293<sup>EL</sup> cells (clone 33) were treated with DMSO (as control) or Hydroxy Dynasore (20 µM, 3h) prior to immunofluorescence using α-FLAG (green, to detect FLAG-EEA1) and α-RAB5 (magenta) antibodies, and nuclei were stained with Hoechst 33342 (blue). Image analysis indicates that the Mander's coefficient is ~0.7 for both the overlap of FLAG puncta with RAB5 and RAB5 puncta with FLAG over 10 cells.

d, Volcano plot depicting the enrichment of various lipid classes within Endo-IP as compared with control immune complexes (data from **Supplementary Data 6**) (n=3). Two-sided Student's t-test was performed and adjusted for multiple comparisons by two-stage Benjamini & Hochberg step-up procedure.

e, Individual phosphatidylcholine species found to be enriched or de-enriched in Endo-IPs based on lipidomics (data from **Supplementary Data 6**).

f, Log<sub>2</sub>FC for the indicated BMP species identified by lipidomics in either Endo-IP or Lyso-IP samples (n=3) (data from **Supplementary Data 6**).



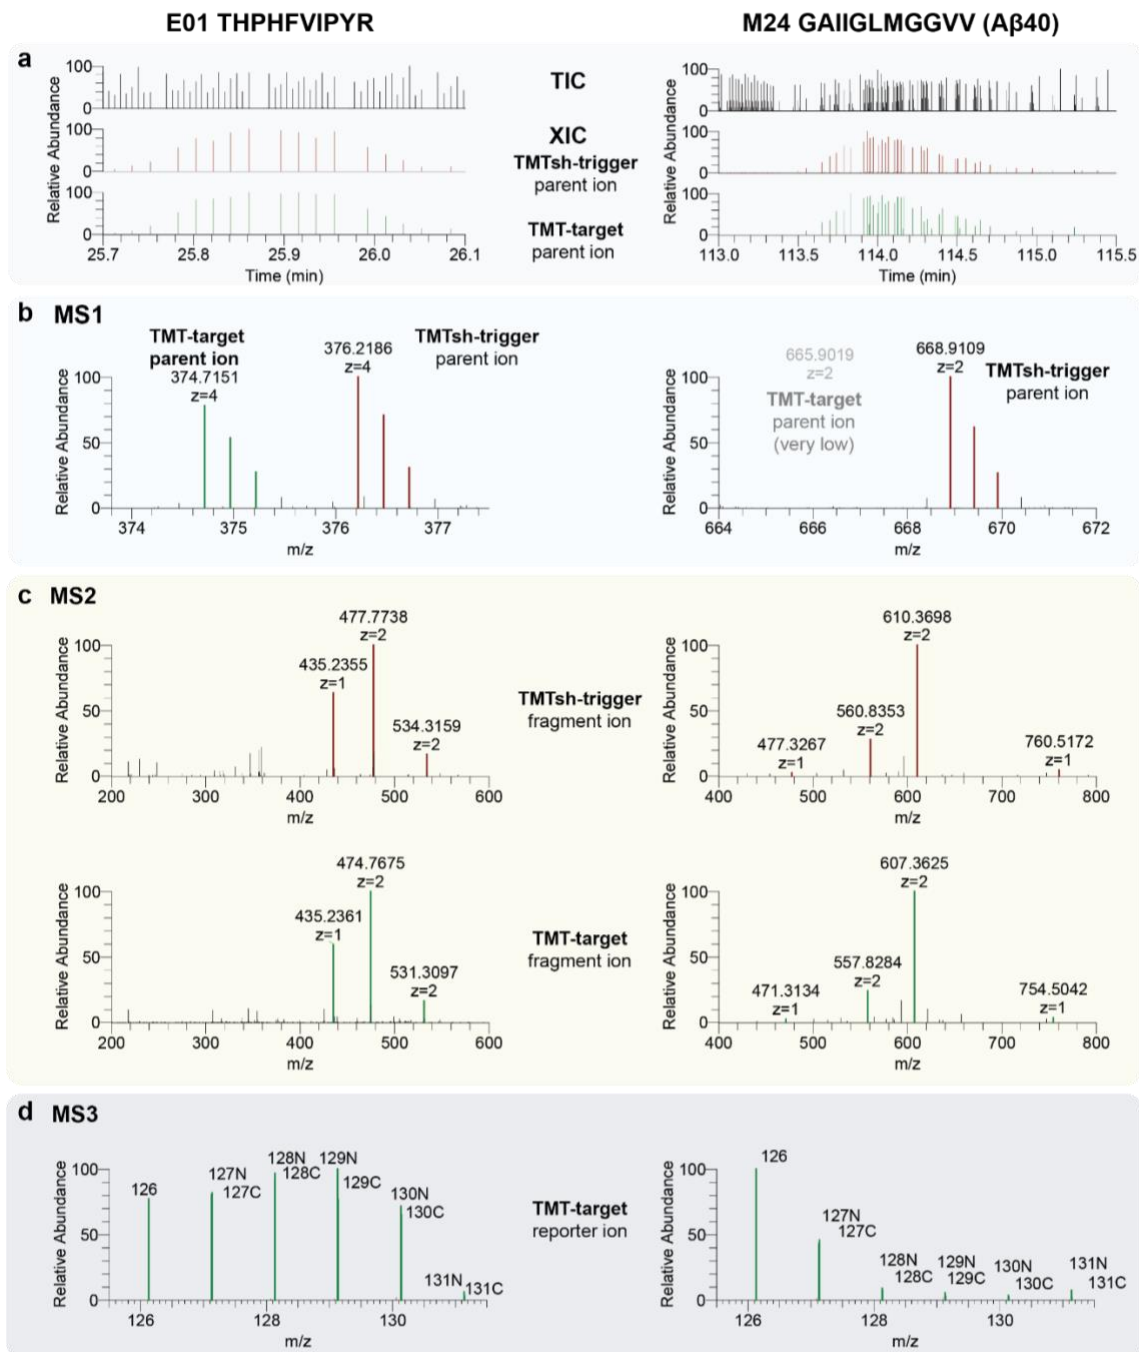

**Supplementary Fig. 4. Half-tryptic peptides for quantification of A $\beta$  peptides.**

a-d, MS<sup>2</sup> fragmentation patterns for selected APP peptides, indicating fragment ions employed as triggers for TOMAHAQ proteomics.



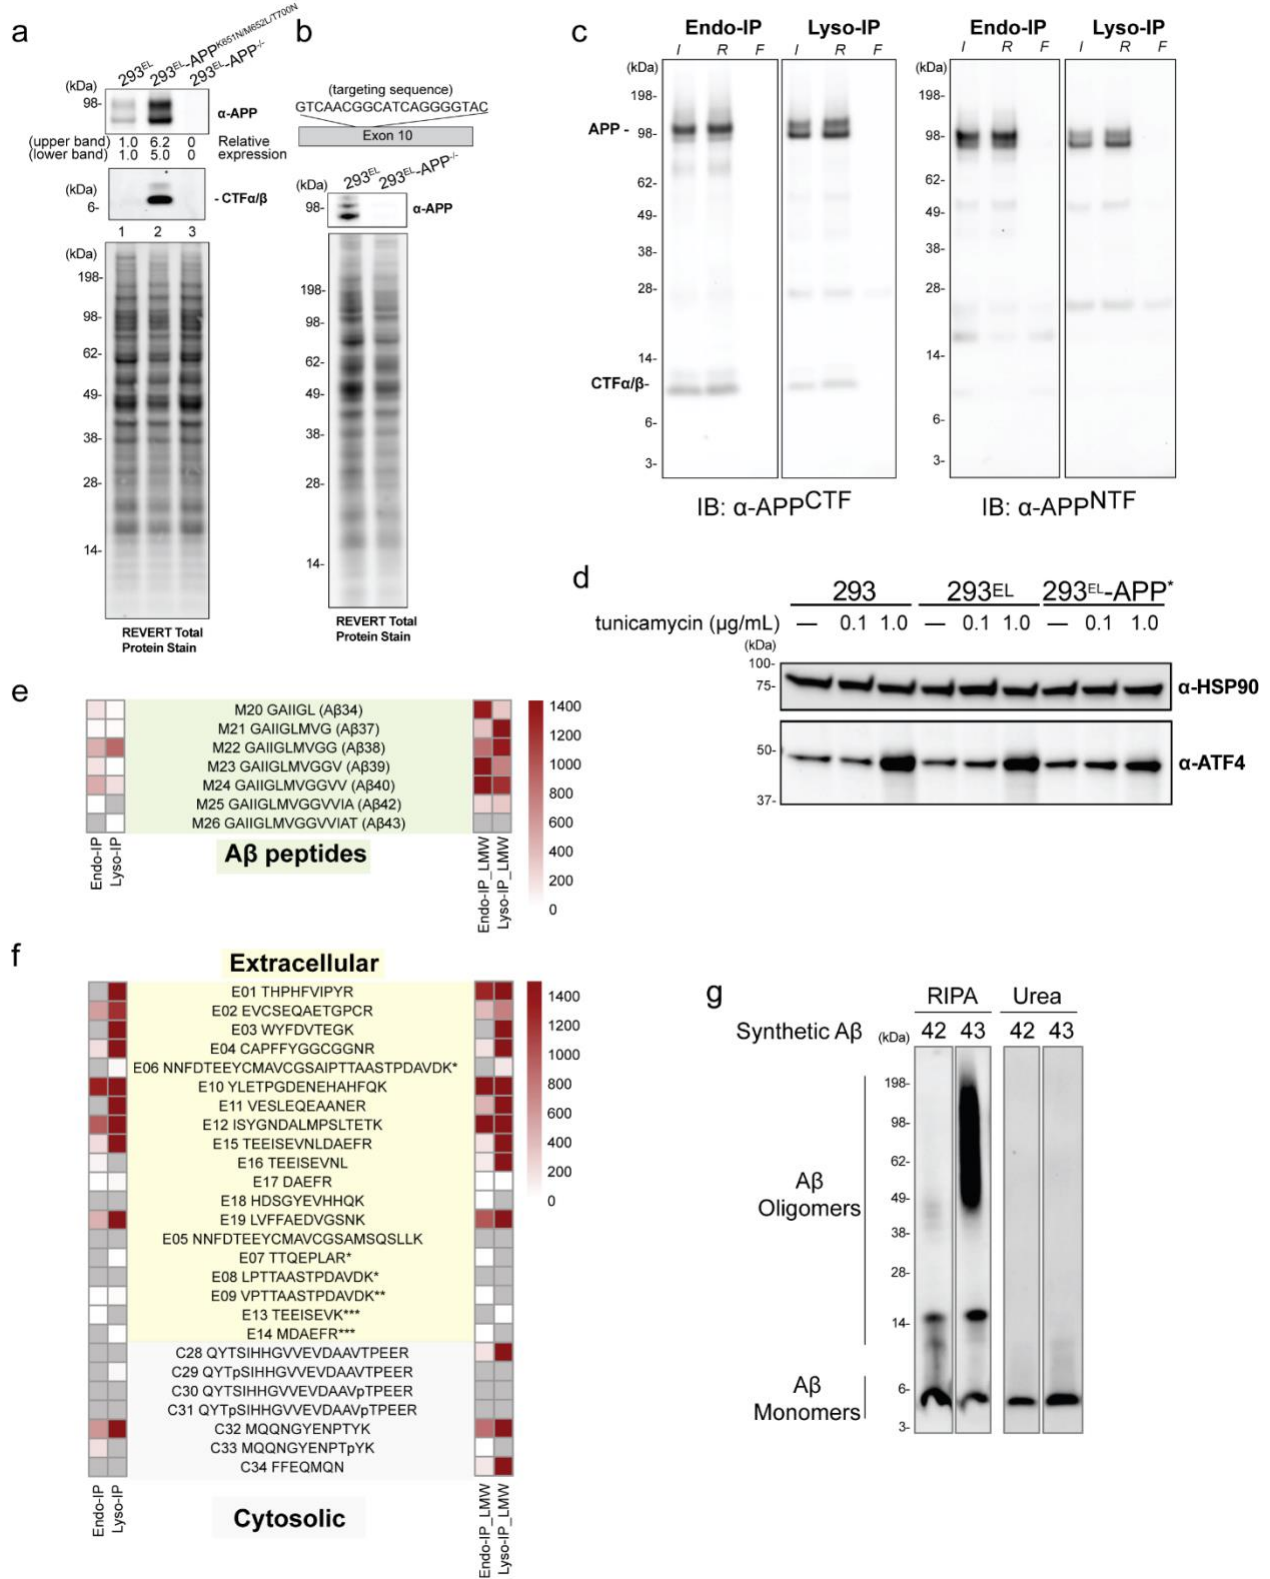

**Supplementary Fig. 5. Application of spatial endolysosomal proteomics to analysis of APP processing.** a, 293<sup>EL</sup>-APP<sup>-/-</sup> cells (see panel b) were transduced with a lentiviral vector expressing APP<sup>Sw;T700N</sup> to generate 293<sup>EL</sup>-APP<sup>\*</sup> and extracts from these cells immunoblotted with the indicated antibodies. APP was expressed at

6-fold higher levels than endogenous APP in parental cells. CTF $\alpha/\beta$  were not appreciably detected in 293<sup>EL</sup> cells.

b, Creation of 293<sup>EL</sup> cells lacking APP. The indicated CRISPR gRNA was used to create a frameshift in exon 14 of APP. Extracts from parental and APP<sup>-/-</sup> cells were subjected to immunoblotting to demonstrate loss of APP, using total amount of loaded proteins as a loading control.

c, Full immunoblots of data shown in **Fig. 5f** probed with  $\alpha$ -C-terminal APP ( $\alpha$ -APP<sup>CTF</sup>) and  $\alpha$ -N-terminal APP ( $\alpha$ -APP<sup>NTF</sup>) antibodies.

d, 293<sup>EL</sup> or 293<sup>EL</sup>-APP\* cells were either left untreated or treated with Tunicamycin (1h) as a positive control for induction of the integrated stress response, and cell extracts probed with  $\alpha$ -ATF4.

e,f, Heat maps showing the signal/noise (S/N) ratios for APP peptides in the context of biological duplicate Endo-IP or Lyso-IP, with or without LMW enrichment (n=2). Gray squares indicate cases where the endogenous peptide was below the detection limit, whereas white squares indicate peptide detection but with extremely low S/N.

g, SDS-PAGE analysis of synthetic A $\beta$ 42/43 solubilized in either RIPA buffer or 8 M urea. Peptides were detected by  $\alpha$ -A $\beta$  (6E10). Samples solubilized in RIPA buffer have detectable oligomers and are observed as monomers when solubilized in urea.

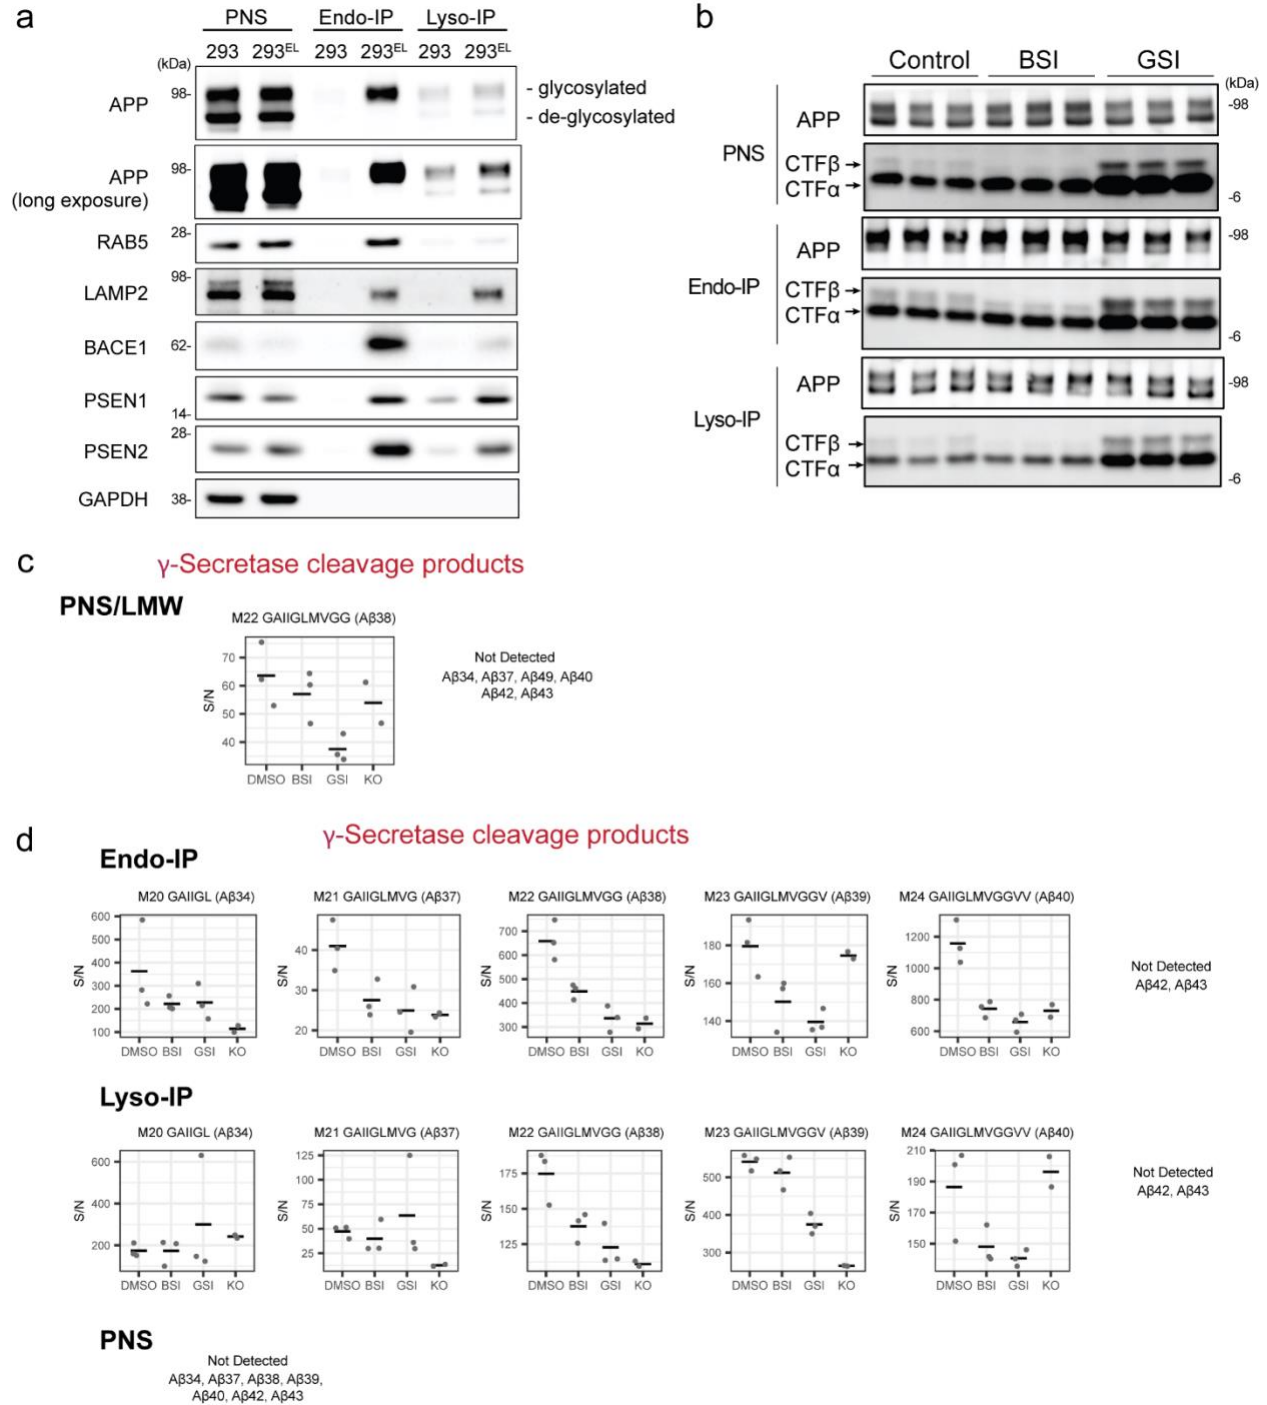

**Supplementary Fig. 6. Digital snapshots of APP/A $\beta$  processing in early endosome and lysosomal compartments.**

a, 293 or 293<sup>EL</sup> cells were subjected to Endo-IP ( $\alpha$ -FLAG) or Lyso-IP ( $\alpha$ -HA) and immune complexes lysed in RIPA buffer prior to immunoblotting with the indicated antibodies. PNS fractions were analyzed in parallel. The positions of glycosylated and de-glycosylated APP are indicated.

b, Immunoblots of full-length APP and the CTF $\alpha/\beta$  fragments in the PNS, Endo-IP or Lyso-IP corresponding to the experiments shown in **Fig. 6b,c** (biological triplicates, n=3). The images for Endo-IP and Lyso-IP are the same images as in **Fig. 6c** but are shown here to allow comparison with the PNS sample.

- c, Signal/noise plots for  $\gamma$ -Secretase cleavage products identified in the PNS sample with LMW enrichment corresponding to **Fig. 6a,b** (biological triplicates, n=3).
- d, Signal/noise plots for  $\gamma$ -Secretase cleavage products from PNS, Endo-IP, and Lyso-IP without LMW enrichment. Peptides below the detection limit are indicated (biological triplicates, n=3).

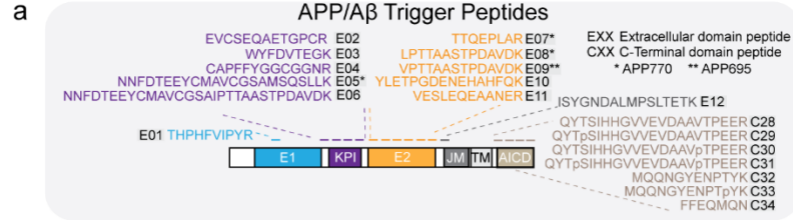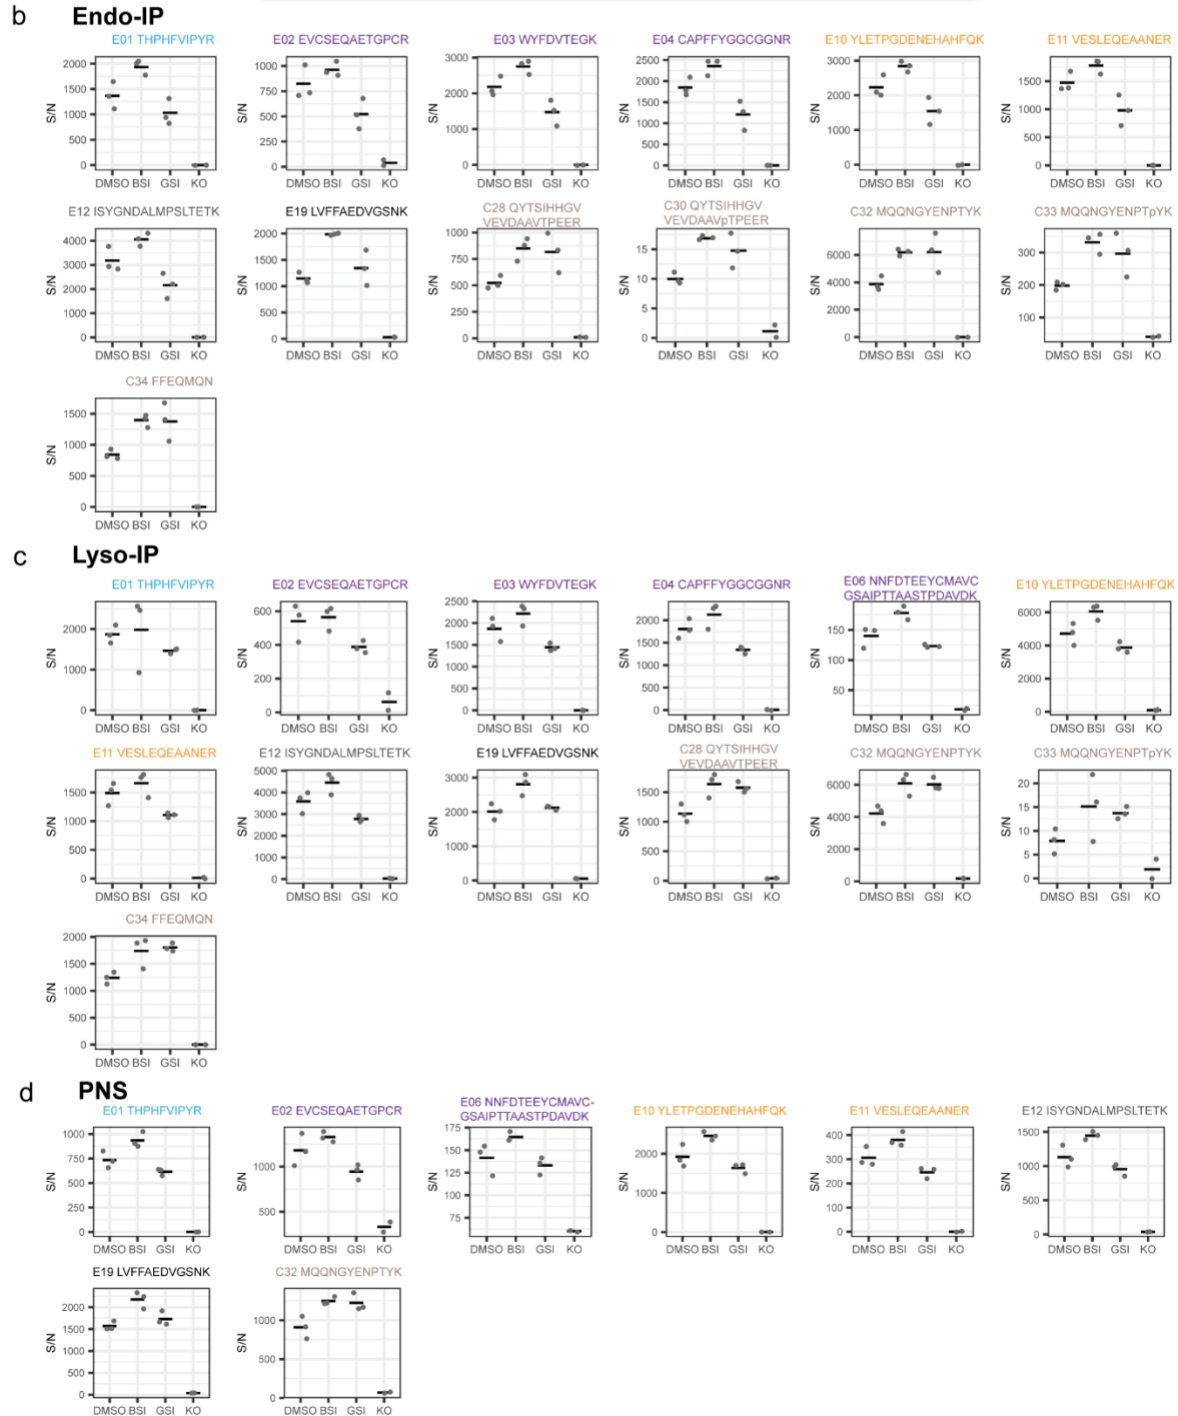

**Supplementary Fig. 7. Analysis of peptides derived from extracellular and C-terminal domains in APP present in PNS, Endo-IP and Lyso-IP.**

a, Domain schematic of APP indicating the sequences and locations of APP trigger peptides in these regions of the protein.

b-d, Signal/noise plots for peptides derived from the extracellular and C-terminal domains of APP present in the Endo-IP (panel B), Lyso-IP (panel C), and PNS (panel D) without LMW enrichment (corresponding to **Fig. 6a,b**) (biological triplicates, n=3). Color of peptide sequences corresponds to the domain localization in panel A. Peptides not shown were not detected above the signal seen in samples from 293<sup>EL</sup>-APP<sup>-/-</sup> cells.

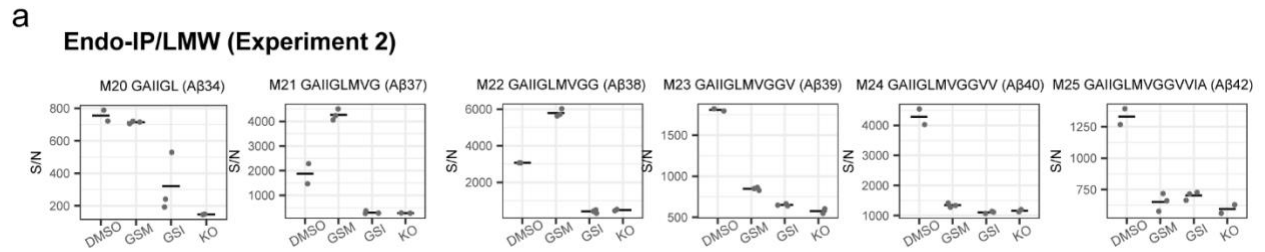

**Supplementary Fig. 8. Quantitative assessment of  $\gamma$ -secretase modulator action on APP in early endosomes.**

a, Quantitative analysis of A $\beta$  peptides in biological triplicate (n=3) Endo-IP samples after LMW filtration from a fully independent replication of the Endo-IP experiment in **Fig. 7a**. Signal-to-noise for MS<sup>3</sup> intensities (relative to APP<sup>-/-</sup> cells, n=2) is shown. Asterisks refer to *t*-test of DMSO treated samples versus compound treatment: *n.s.*, not significant; \*,  $p \leq 0.05$ ; \*\*,  $p \leq 0.01$ ; \*\*\*,  $p \leq 0.001$ .
