# Supplementary material for: Spatial snapshots of amyloid precursor protein intramembrane processing via early endosome proteomics
Source: PubMed Central journal article supplement (PMC9573879; doi:10.1038/s41467-022-33881-x), 2022-10-16
Supplement: 41467_2022_33881_MOESM3_ESM.pdf [file 41467_2022_33881_MOESM3_ESM.pdf]

## **Description of Additional Supplementary Files and Source Data:**

**Supplementary Data 1.** Quantitative proteomic analysis for screening bait proteins to develop Endo-IP (related to **Fig. 1a, Supplementary Fig. 1c**).

**Supplementary Data 2.** Quantitative total proteomes of cells expressing FLAG-EEA1 (Related to **Supplementary Fig. 1e,f**).

**Supplementary Data 3.** Quantitative proteomics of FLAG-EEA1-purified endosomes versus control immunoprecipitates (related to **Fig. 2a-e**).

**Supplementary Data 4.** Quantitative proteomics of TMEM192-HA-purified lysosomes versus control immunoprecipitates (related to **Supplementary Fig. 2a-e**).

**Supplementary Data 5.** Quantitative proteomics of FLAG-EEA1-purified endosomes in the presence and absence of dynamin inhibitor or TF (related to **Fig. 3a-e; Supplementary Fig. 3a-c**).

**Supplementary Data 6.** Lipidomic analysis of FLAG-EEA1 immunoprecipitates relative to control cells lacking FLAG-EEA1 (related for **Fig. 3f, Supplementary Fig. 3d-f**).

**Supplementary Data 7.** APP/A $\beta$  reference peptides employed in TOMAHAQ experiments (related to **Fig. 4e**).

**Supplementary Data 8.** A $\beta$ 40/42/43 in vitro TOMAHAQ data. (related to **Fig. 4c,d**).

**Supplementary Data 9.** TOMAHAQ analysis of Endo- and Lyso-IP samples with and without filtration (related to **Fig. 5c-g, Supplementary Fig. 5e,f**).

**Supplementary Data 10.** TOMAHAQ analysis of Endo- and Lyso-IP samples from cells treated with BSI or GSI (relevant to **Fig. 6a,e,f; Supplementary Fig. 6c,d, Supplementary Fig. 7**).

**Supplementary Data 11.** Absolute quantification of Endo- and Lyso-IP samples from cells treated with BSI or GSI. (relevant to **Fig. 6a,e,f**).

**Supplementary Data 12.** TOMAHAQ analysis of Endo- and Lyso-IP samples from cells treated with GSM or GSI (relevant to **Fig. 7c,d**).

**Supplementary Data 13.** Absolute quantification of Endo- and Lyso-IP samples from cells treated with GSM or GSI. (relevant to **Fig. 7c,d**).

**Supplementary Data 14.** Details of reagents and materials used in this study.

**Supplementary Data 15.** Annotated lipid spectra (relevant to **Fig. 3f**).

**Source Data 1.** Uncropped images from all SDS-PAGE gels in this study.

**Source Data 2.** Source data for plots.
